# Supplementary material
Source: publisher site journal article supplement (https://www.dovepress.com/article/457643)
Supplement: Supplementary file 1 [file get_supplementary_file.php]

1. The sizes is 31.03±5.59 nm in TEM.

Table S1 Statistics of particle size of nanoparticles

| No. | Particle size/nm |
| --- | --- |
| 1 | 37.31 |
| 2 | 42.57 |
| 3 | 35.42 |
| 4 | 37.88 |
| 5 | 34.66 |
| 6 | 33.85 |
| 7 | 38.24 |
| 8 | 32.37 |
| 9 | 32.63 |
| 10 | 33.56 |
| 11 | 32.16 |
| 12 | 36.33 |
| 13 | 31.62 |
| 14 | 32.59 |
| 15 | 30.41 |
| 16 | 33.81 |
| 17 | 24.53 |
| 18 | 20.21 |
| 19 | 19.61 |
| 20 | 27.61 |
| 21  22 | 22.36  27.31 |
| 23 | 26.97 |
| 24  25  26  27 | 26.10  31.65  29.41  26.78 |

2. The mathematical kinetic models was listed in Figure S1 and Table S2.


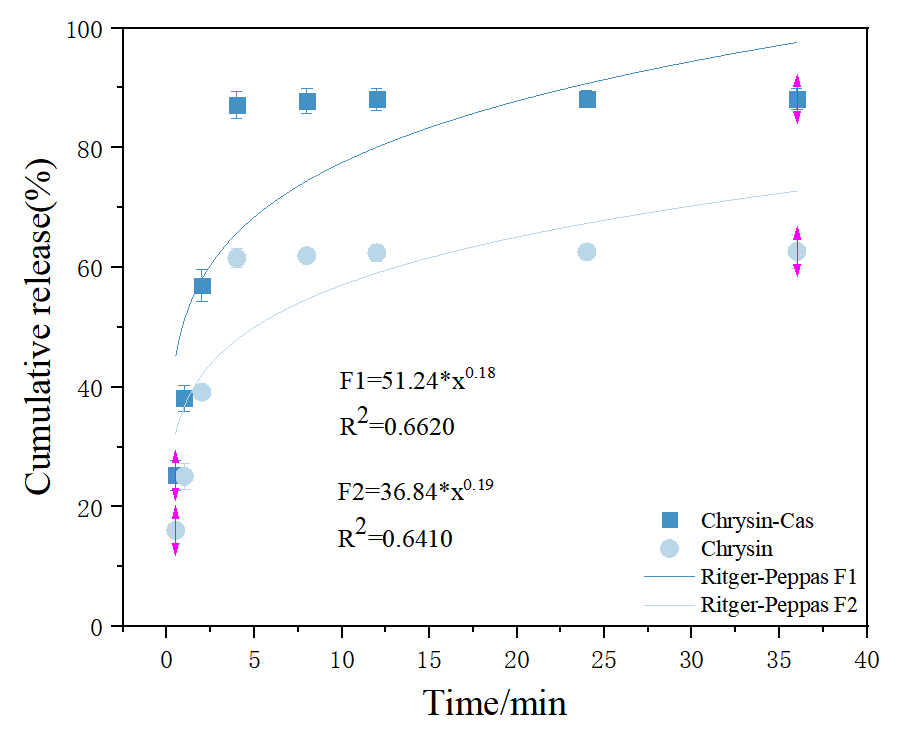

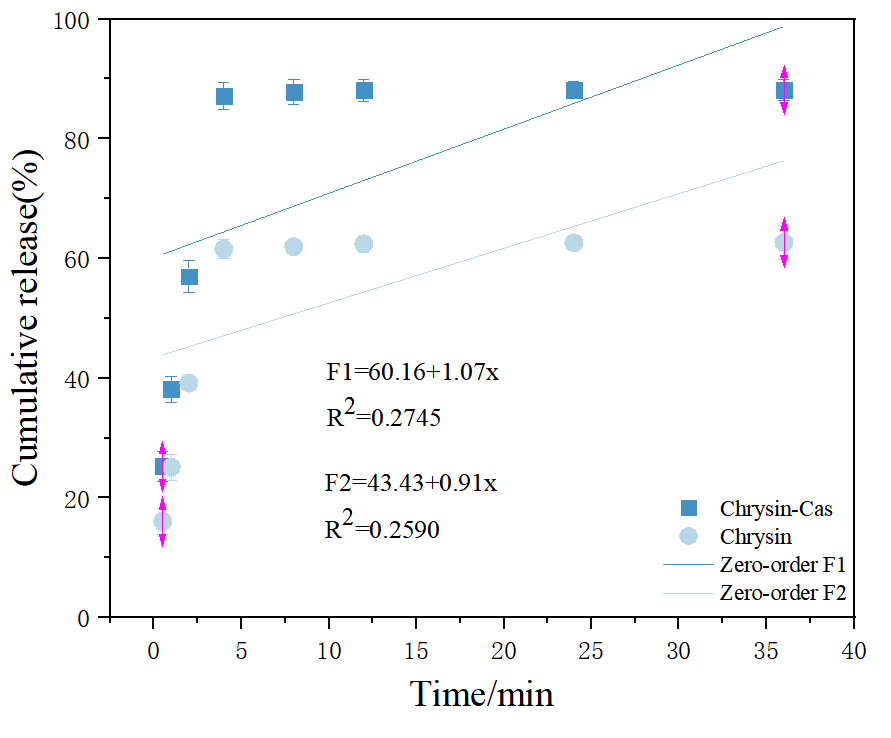

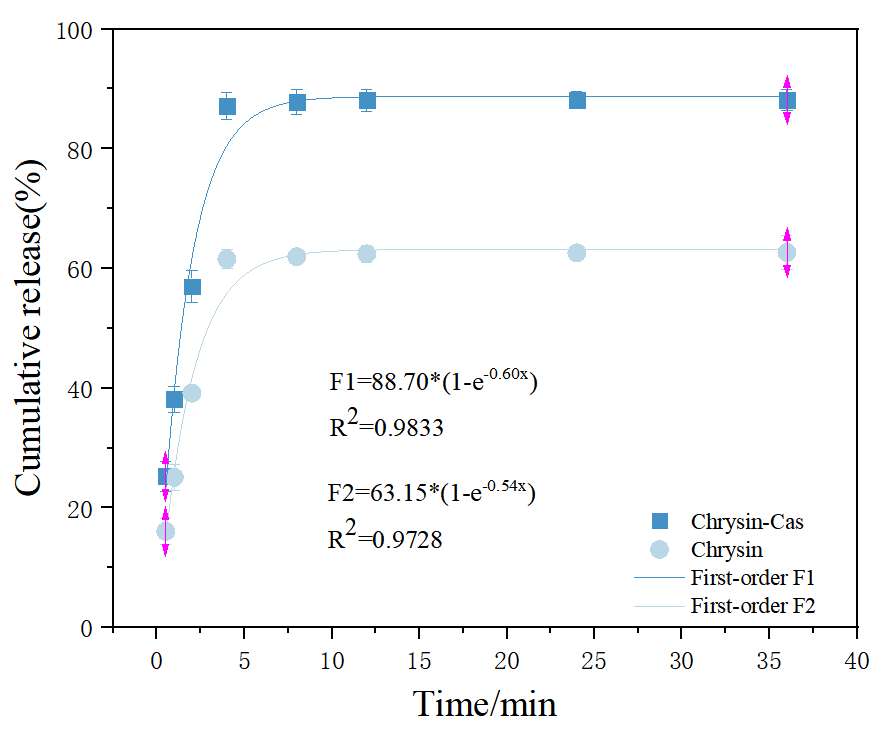

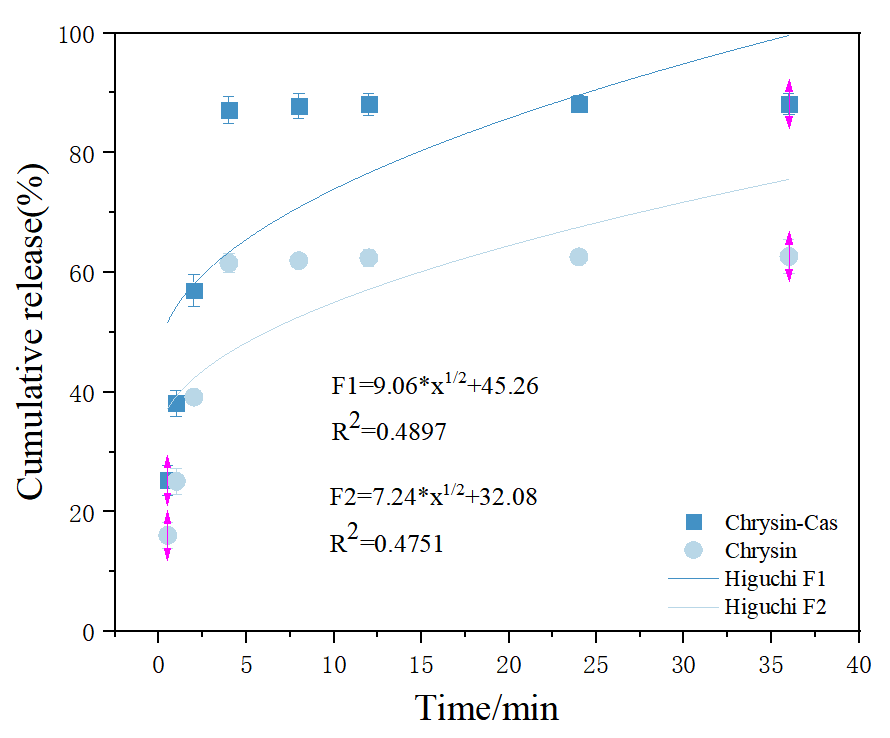


Figure S1 The mathematical kinetic models

Table S2 Kinetic mathematical models calculations

| Formulation | Zero-order | First-order | Higuchi | Ritger-Peppas |
| --- | --- | --- | --- | --- |
|  | R2 | R2 | R2 | R2 |
| F1 | 0.2745 | 0.9833 | 0.4897 | 0.6620 |
| F2 | 0.2590 | 0.9728 | 0.4751 | 0.6410 |

a F1 refers to CCP;F2 refers to Chrysin.
